# Supplementary material for: Enhancing Durum Wheat Grain Quality and Safety: The Role of Organic Foliar Fertilization and Selenium Biofortification in Mediterranean Farming Systems
Source: Research Square preprint supplement (doi:10.21203/rs.3.rs-7797922/v1), 2025-10-21
Supplement: Supplementary file 1 [file 8947cbd78422ebe7c788f2d8.docx]

**Enhancing Durum Wheat Grain Quality and Safety: The Role of Organic Foliar Fertilization and Selenium Biofortification in Mediterranean Farming Systems**

Federica Caruccia, Giuseppe Gattab*, Massimo Blandinoc, Valentina Scarpinoc, Gustavo Moreno-Martínd, Yolanda Madrid-Albarránd, Marcella Michela Giulianib

a University of Tuscia, Dipartimento di Scienze Agrarie e Forestali (DAFNE), 01100 Viterbo, Italy. [federica.carucci@unitus.it](mailto:federica.carucci@unitus.it).

b University of Foggia, Dipartimento di Scienze Agrarie, Alimenti, Risorse Naturali e Ingegneria (DAFNE), 71122 Foggia, FG, Italy. [giuseppe.gatta@unifg.it](mailto:giuseppe.gatta@unifg.it), [marcella.giuliani@unifg.it](mailto:marcella.giuliani@unifg.it)

c University of Turin, Dipartimento di Scienze Agrarie, Forestali e Alimentari, Largo Paolo Braccini 2, 10095, Grugliasco, TO, Italy. [massimo.blandino@unito.it](mailto:massimo.blandino@unito.it), [valentina.scarpino@unito.it](mailto:valentina.scarpino@unito.it)

d Universidad Complutense de Madrid, Departamento de Química Analítica, Facultad de Ciencias Químicas, 28040 Madrid, Spain. [ymadrid@quim.ucm.es](mailto:ymadrid@quim.ucm.es), [gusmoren@ucm.es](mailto:gusmoren@ucm.es)

***Corresponding author: giuseppe.gatta@unifg.itgiuseppe.gatta@unifg.it**

This document provides more detailed information on the main paper mentioned above.

The following information is included:

| **Table** | **Content** |
| --- | --- |
| **Table S1** | Dates and details of the main agronomic practices applied during the field trial. |
| **Table S2** | F-value and significance level of the effect of year (Y), cultivar (CV), foliar fertilization (F), selenium application (Se), and their interaction on protein fraction resulting from analysis of variance (ANOVA). |
| **Table S3** | F-value and significance level of the effect of year (Y), cultivar (CV), foliar fertilization (F), selenium application (Se), and their interaction on macro and micro nutrient grain concentration resulting from analysis of variance (ANOVA). |
| **Table S4** | F-value and significance level of the effect of year (Y), cultivar (V), foliar fertilization (F), selenium application (Se), and their interaction on the mycotoxin contamination in durum wheat grain resulting from analysis of variance (ANOVA). |

**Table S1.** Dates and details of the main agronomic practices applied during the field trial.

| **Main agronomic management** | **Growing season** | | **Rate** |
| --- | --- | --- | --- |
| **2018** | **2019** |
| Sowing | December 1st | November 24th | 350 seeds m−2. |
| Dry Blood Meal (N14.5%; C44%; C/N3.03) application | December 1st | November 24th | 50 kg ha-1 |
| Bio Sulphur (S = 50%) application | March 27th | March 21st | 45 kg ha-1 |
| Sodium selenate application | April 20th | April 18th | 60 g ha-1 |
| Liquid Blood Meal (N = 4%) application | April 24th | May 10th | 20 kg ha-1 |
| Harvest | June 29th | June 18th | - |

**Table S2**. F-value and significance level of the effect of year (Y), cultivar (CV), foliar fertilization (F), selenium application (Se), and their interaction on protein fraction resulting from analysis of variance (ANOVA).

| Factor | DF | SLP | ILP | Polymeric protein fraction | Monomeric protein fraction | mon/pol | UPP | GI |
| --- | --- | --- | --- | --- | --- | --- | --- | --- |
| Y | 1 | 426.99*** | 37.475*** | 1237.3*** | 1237.3*** | 1262.94*** | 7.591** | 1679.68*** |
| CV | 3 | 130.58*** | 286.634*** | 146.33*** | 146.33*** | 132.55*** | 288.786*** | 3883.98*** |
| F | 3 | 17.22*** | 25.901*** | 1.61ns | 1.61ns | 1.57ns | 42.335*** | 20.59*** |
| Se | 1 | 0.00ns | 0.016ns | 0.35ns | 0.35ns | 0.22ns | 0.274ns | 1.95ns |
| YxCV | 3 | 11.56*** | 84.65*** | 72.64*** | 72.64*** | 59.61*** | 40.1*** | 10.35*** |
| YxF | 3 | 11.36*** | 15.101*** | 0.48ns | 0.48ns | 0.57ns | 22.418*** | 37.59*** |
| CVxF | 9 | 3.2* | 6.842*** | 1.86ns | 1.86ns | 1.73ns | 7.416*** | 17.64*** |
| YxSe | 1 | 0.17ns | 0.384ns | 0.08ns | 0.08ns | 0.12ns | 0.486ns | 105.12*** |
| CVxSe | 3 | 2.05ns | 3.865* | 0.38ns | 0.38ns | 0.47ns | 4.514** | 35.62*** |
| FxSe | 3 | 3.08* | 2.848* | 1.28 ns | 1.28ns | 1.12ns | 3.877* | 0.26ns |
| YxCVxF | 9 | 7.94*** | 19.483*** | 6.68*** | 6.68*** | 7.1*** | 21.306*** | 6.29*** |
| YxCVxSe | 3 | 1.7ns | 1.911ns | 0.7ns | 0.7ns | 0.7ns | 2.118ns | 8.35*** |
| YxFxSe | 3 | 2.17ns | 13.152*** | 8.42*** | 8.42*** | 8.27*** | 9.878*** | 29.49*** |
| VxFxSe | 9 | 2.59** | 9.905*** | 4.77*** | 4.77*** | 5.73*** | 10.49*** | 16.35*** |
| YxCVxFxSe | 9 | 6.64*** | 19.485*** | 2.85** | 2.85** | 3** | 21.723*** | 11.35*** |

DF: degree of freedom; SLP: soluble large polymers; ILP: insoluble large polymers; mon/pol: monomeric/polymeric ratio; UPP: unextractable polymeric protein; GI: gluten index.

*** p-value ≤ 0.001; ** p-value ≤ 0.01; * p-value ≤ 0.05; ns not significant.

**Table S3.** F-value and significance level of the effect of year (Y), cultivar (CV), foliar fertilization (F), selenium application (Se), and their interaction on macro and micro nutrient grain concentration resulting from analysis of variance (ANOVA).

| Factor | DF | Grain [N] | Grain [S] | Grain [Se] | Grain [Fe] | Grain [Zn] |
| --- | --- | --- | --- | --- | --- | --- |
| Y | 1 | 3815.25*** | 2721.917*** | 30.108*** | 202.829*** | 1599.287*** |
| CV | 3 | 22.25*** | 114.953*** | 39.93*** | 38.935*** | 14.048** |
| F | 3 | 2.27ns | 8.866*** | 40.913*** | 11.311*** | 4.66** |
| Se | 1 | 1.68ns | 0.16ns | 2924.688*** | 0.453ns | 4.00ns |
| YxCV | 3 | 44.1*** | 184.421*** | 55.245*** | 56.874*** | 6.786*** |
| YxF | 3 | 3.61* | 21.62*** | 10.462*** | 10.018*** | 7.413*** |
| CVxF | 9 | 10.77*** | 6.541*** | 7.095*** | 5.871*** | 4.727** |
| YxSe | 1 | 0.02ns | 0.445ns | 15.865*** | 16.005*** | 10.439*** |
| CVxSe | 3 | 3.00* | 2.059ns | 15.213*** | 1.79ns | 1.116ns |
| FxSe | 3 | 3.14* | 4.196** | 15.345*** | 2.861* | 4.235** |
| YxCVxF | 9 | 16.2*** | 14.372*** | 4.707*** | 12.024*** | 5.064*** |
| YxCVxSe | 3 | 1.28ns | 0.777ns | 8.299*** | 2.631ns | 0.448ns |
| YxFxSe | 3 | 4.85** | 2.344ns | 1.272ns | 4.323** | 0.908ns |
| VxFxSe | 9 | 1.36ns | 1.284ns | 0.594ns | 4.17*** | 1.448ns |
| YxCVxFxSe | 9 | 2.46** | 2.455* | 0.868ns | 2.879** | 1.886ns |

DF: degree of freedom; grain [N], [S], [Se], [Fe] and [Zn]: nitrogen, sulphur, selenium, iron and zinc grain concentrations.

*** p-value ≤ 0.001; ** p-value ≤ 0.01; * p-value ≤ 0.05; ns not significant).

**Table S 4.** F-value and significance level of the effect of year (Y), cultivar (V), foliar fertilization (F), selenium application (Se), and their interaction on the mycotoxin contamination in durum wheat grain resulting from analysis of variance (ANOVA).

| Factor | DF | DONtot | DON | DON-3-G | MON | ENNtot |
| --- | --- | --- | --- | --- | --- | --- |
| Y | 1 | 45.8287*** | 13.8618*** | 205.3161*** | 22.692** | 38.3567*** |
| V | 1 | 1597.3811* | 1116.5985*** | 629.9129*** | 6.2776* | 1989.7170*** |
| F | 1 | 59.9452*** | 38.2226*** | 20.5896*** | 121.9709*** | 161.8355*** |
| Se | 1 | 247.3475*** | 153.3908*** | 203.8461*** | 110.1052*** | 541.9325*** |
| YxV | 1 | 17.1765*** | 12.8164** | 2.3538ns | 32.4134*** | 1.3339ns |
| YxF | 1 | 1.7511ns | 1.2783ns | 0.1786ns | 10.0813** | 42.3342*** |
| VxF | 1 | 16.1346*** | 16.2995*** | 0.7379ns | 14.3082*** | 23.5756ns |
| YxSe | 1 | 0.4074ns | 0.7725ns | 0.0029ns | 0.7815ns | 4.0505*** |
| VxSe | 1 | 1.1976ns | 0.4323ns | 2.9577ns | 2.0204ns | 12.1876** |
| FxSe | 1 | 1.9402ns | 1.4698ns | 1.9123ns | 21.1974*** | 5.9767* |
| YxVxF | 1 | 2.4013ns | 2.0128ns | 0.2011ns | 0.0003ns | 20.2789** |
| YxVxSe | 1 | 2.1900ns | 1.7002ns | 1.4714ns | 6.8077* | 11.8672** |
| YxFxSe | 1 | 0.2642ns | 0.1944ns | 0.2408ns | 0.1764ns | 3.1567ns |
| VxFxSe | 1 | 0.6985ns | 0.5500ns | 0.051ns | 6.8898* | 0.0295ns |
| YxVxFxSe | 1 | 0.0763ns | 0.1375ns | 1.1455ns | 0.4175ns | 0.0374ns |

DF: degree of freedom; DONtot: total deoxynivalenol forms, sum of DON, DON-3-G and 3-ADON; DON: deoxynivalenol; DON-3-G, deoxynivalenol-3-glucoside; MON: moniliformin; ENNtot, total enniatin forms, sum of ENN A, A1, B and B1.

*** p-value ≤ 0.001; ** p-value ≤ 0.01; * p-value ≤ 0.05; ns not significant).
